# Supplementary material for: Recurrent gene co-amplification on Drosophila X and Y chromosomes
Source: PubMed Central journal article supplement (PMC6690552; doi:10.1371/journal.pgen.1008251), 2019-07-22
Supplement: pgen.1008251.s001.pdf [file pgen.1008251.s001.pdf]

## I. INFER Y-AMPLIFIED GENES BASED ON GENOMIC READ COVERAGE

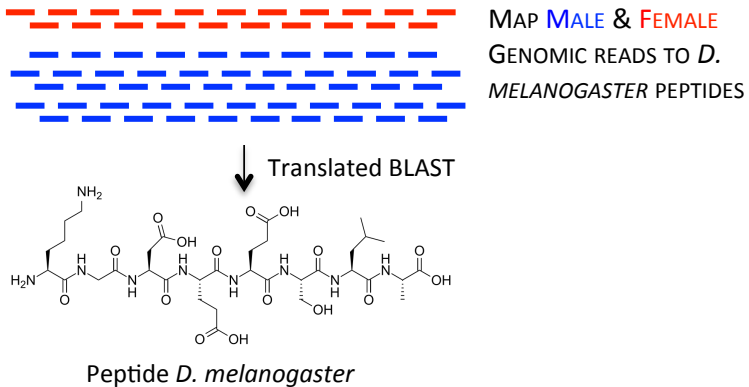

## II. IDENTIFY X-LINKED CONTIGS AND MULTI-COPY X GENES IN FEMALE ASSEMBLY

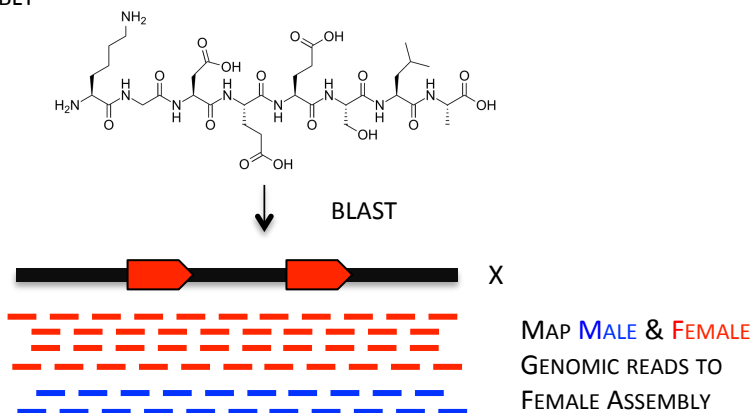

Figure S1
