# Supplementary material for: Recurrent gene co-amplification on Drosophila X and Y chromosomes
Source: PubMed Central journal article supplement (PMC6690552; doi:10.1371/journal.pgen.1008251), 2019-07-22
Supplement: pgen.1008251.s005.pdf [file pgen.1008251.s005.pdf]

$> 10^{-3}$

$10^{-3}$  to  $10^{-5}$

$10^{-5}$  to  $10^{-7}$

$10^{-7}$  to  $10^{-9}$

$< 10^{-9}$

A.

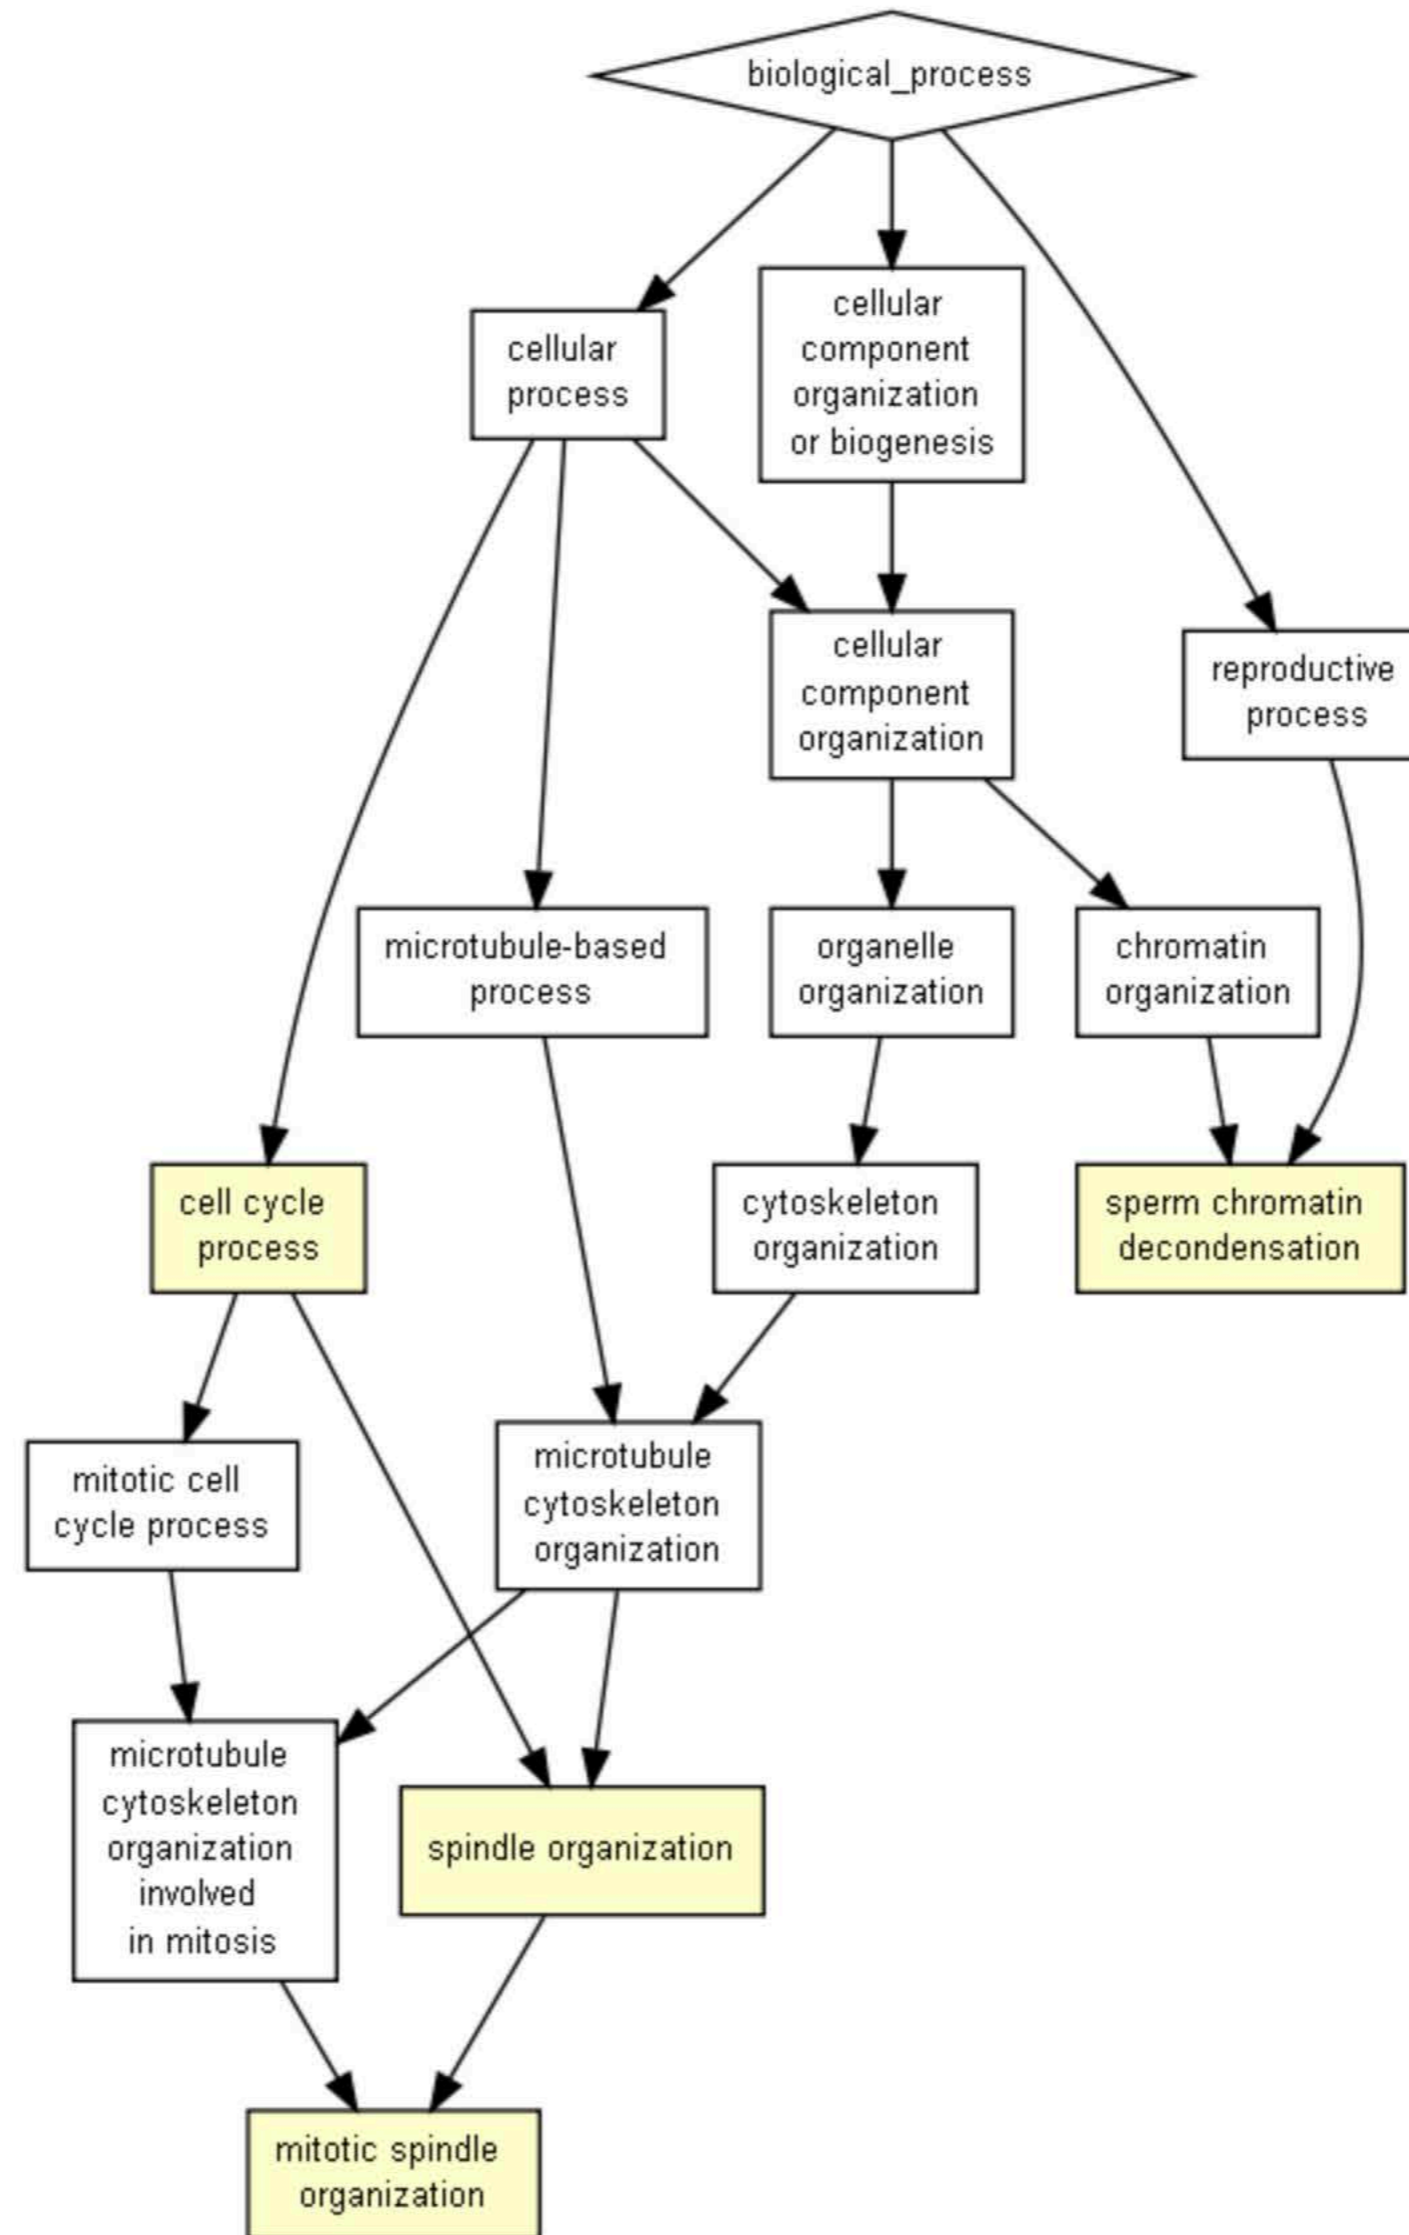

Figure S5
