# Supplementary material for: Recurrent gene co-amplification on Drosophila X and Y chromosomes
Source: PubMed Central journal article supplement (PMC6690552; doi:10.1371/journal.pgen.1008251), 2019-07-22

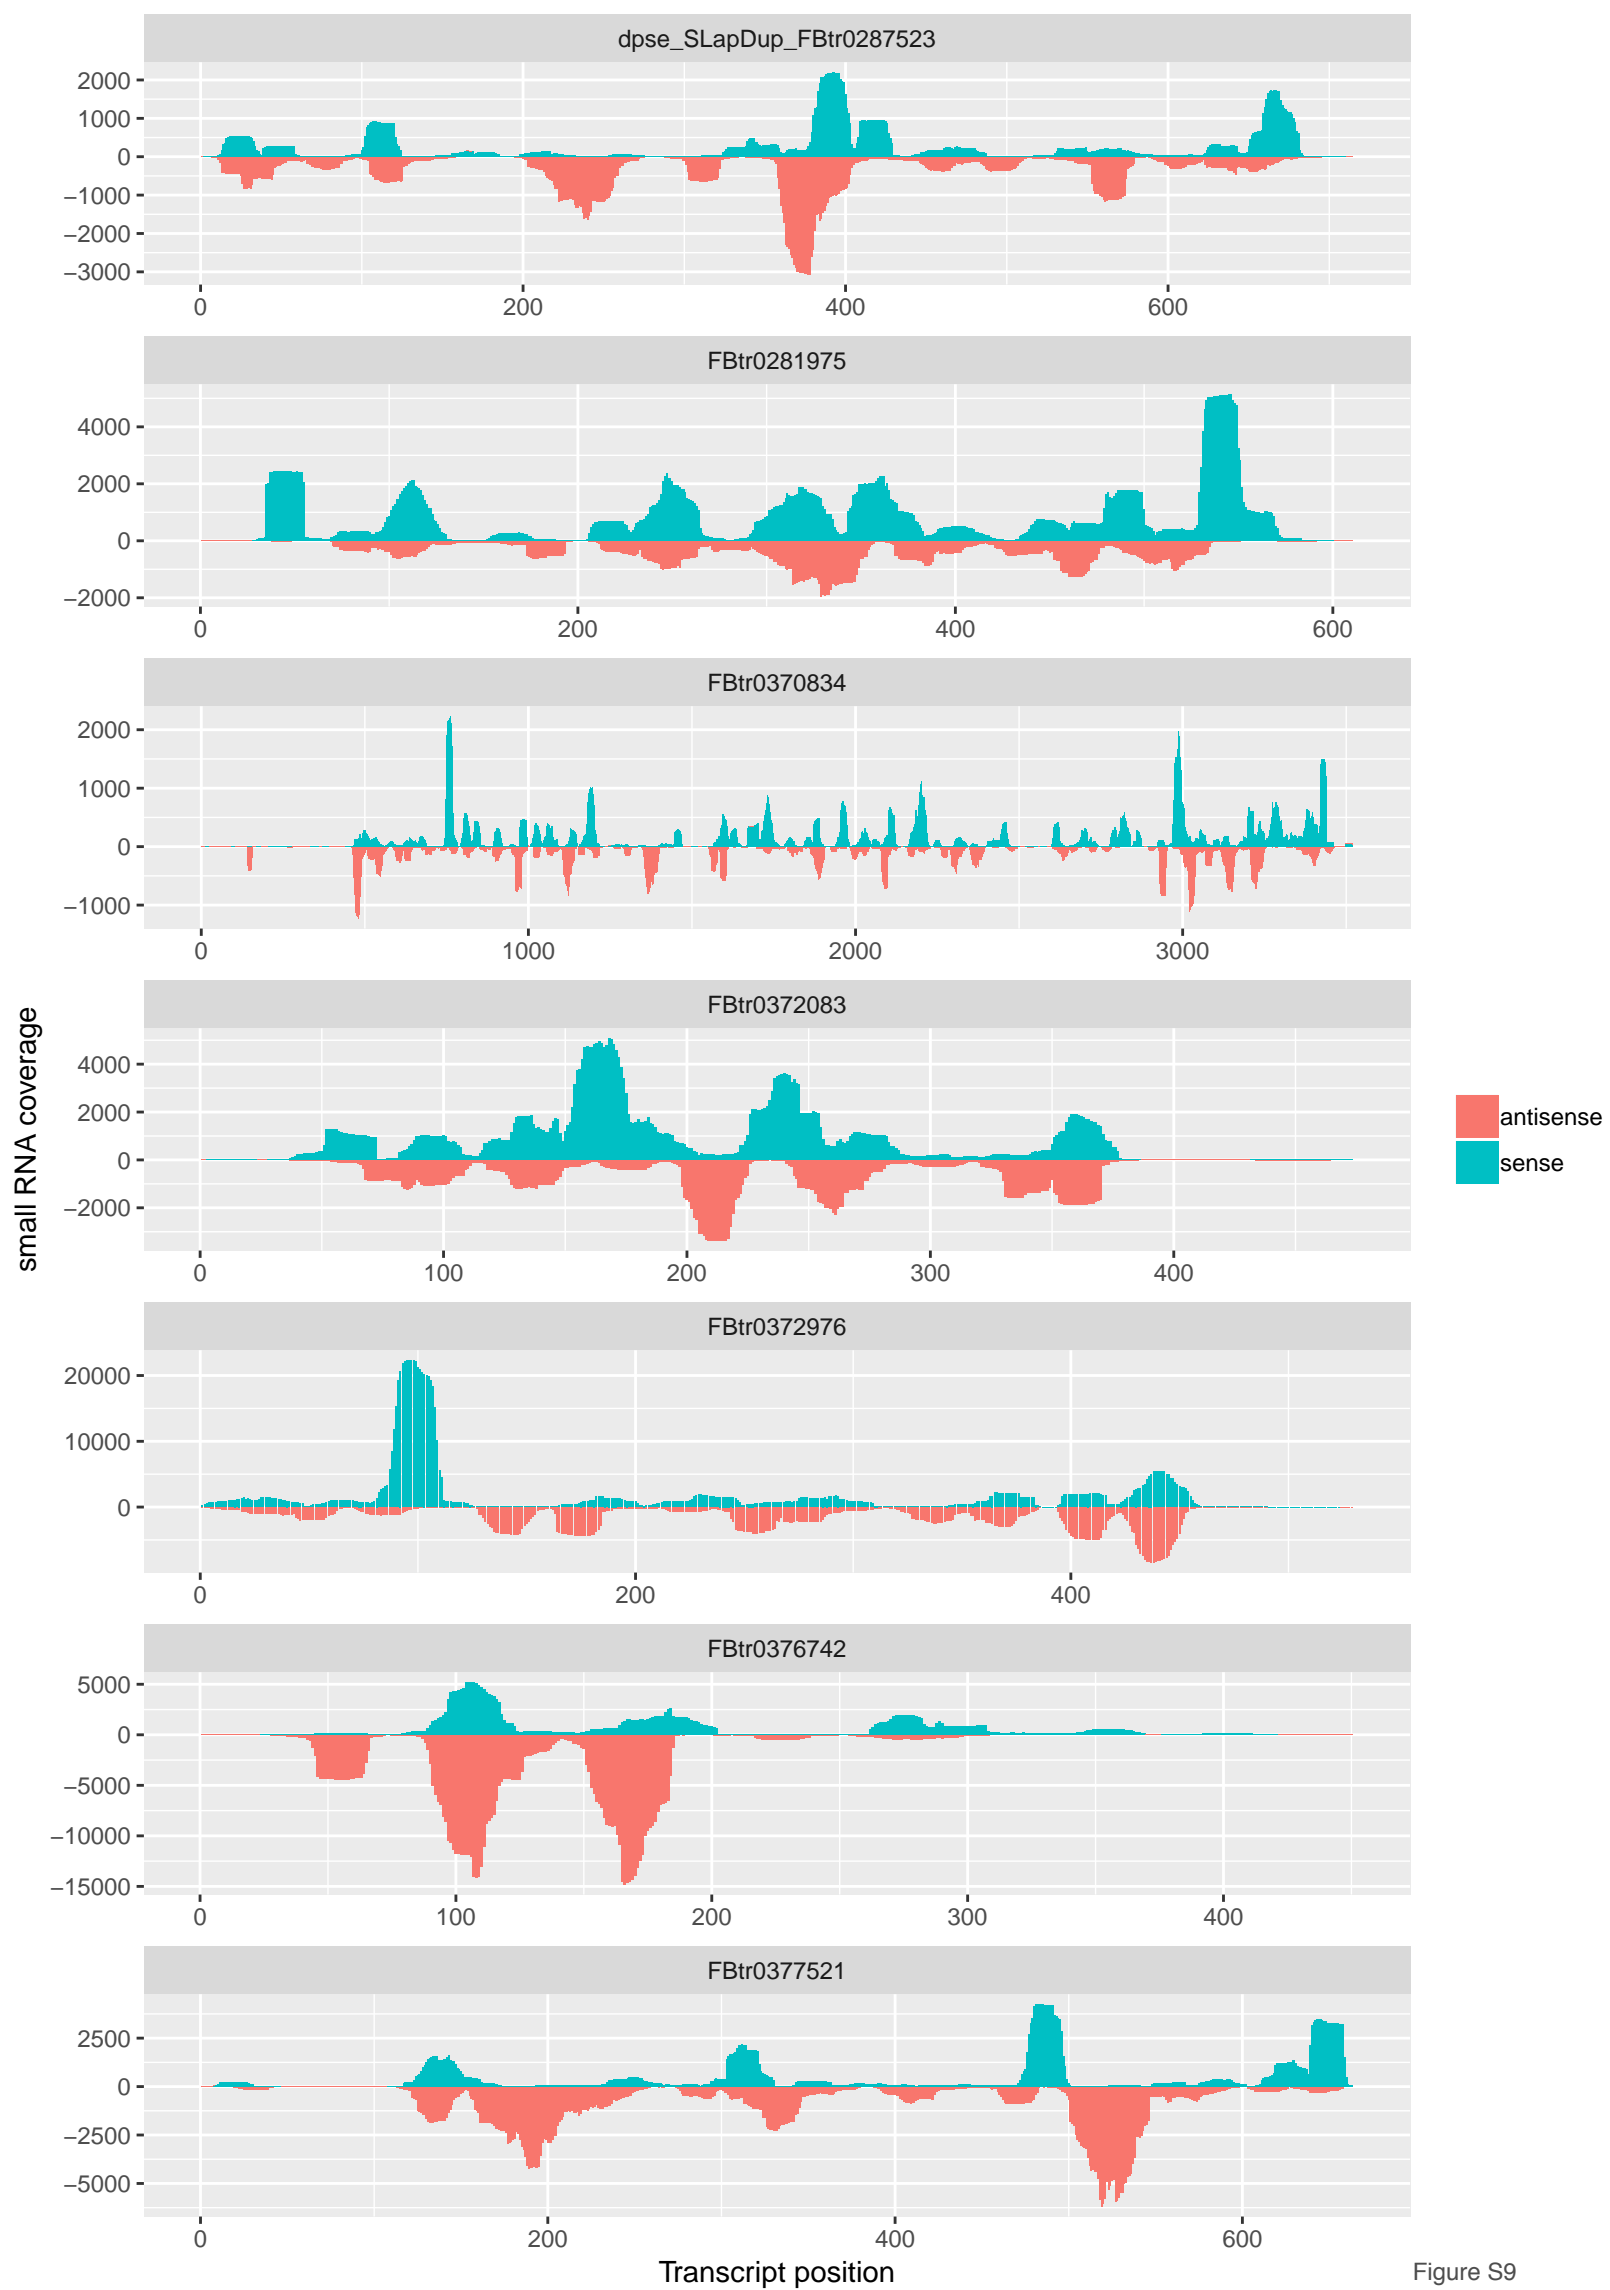

Supplement: pgen.1008251.s009.pdf [file pgen.1008251.s009.pdf]
