# Supplementary material for: Recurrent gene co-amplification on Drosophila X and Y chromosomes
Source: PubMed Central journal article supplement (PMC6690552; doi:10.1371/journal.pgen.1008251), 2019-07-22
Supplement: pgen.1008251.s010.pdf [file pgen.1008251.s010.pdf]

**Table S1. Species used in this study.** Shown are species and stock numbers, total assembly size, and sex chromosome karyotype (see Figure S1).

| Data generated for this study |                 |              |               |          |           |
|-------------------------------|-----------------|--------------|---------------|----------|-----------|
| Genus                         | Species         | Stock Center | Stock Number  | Assembly | Karyotype |
| Drosophila                    | saltans         | UCSD         | 14045-0911.01 | 190 Mb   | A + D     |
| Drosophila                    | nannoptera      | UCSD         | 15090-1692.12 | 135 Mb   | A + D     |
| Drosophila                    | pseudotalamanca | UCSD         | 15040-1191.01 | 146 Mb   | A         |
| Drosophila                    | repletoides     | UCSD         | 15250-2451.00 | 166 Mb   | A + D     |
| Drosophila                    | robusta         | UCSD         | 15020-1111.10 | 184 Mb   | A + D     |
| Drosophila                    | micromelanica   | UCSD         | 15030-1151.01 | 146 Mb   | A         |
| Drosophila                    | melanica        | UCSD         | 15030-1141.03 | 150 Mb   | A + D     |
| Drosophila                    | nigromelanica   | EHIME        | E-22901       | 164 Mb   | A + C     |
| Drosophila                    | lacertosa       | EHIME        | E-14007       | 155 Mb   | A + D     |
| Scaptodrosophila              | lebanonensis    | UCSD         | 11010-0011.00 | 215 Mb   | A + F     |
| Drosophila                    | subbadia        | UCSD         | 15172-2161.00 | 174 Mb   | A         |
| Drosophila                    | guarani         | UCSD         | 15172-2151.00 | 170 Mb   | A         |
| Drosophila                    | quadri-lineata  | EHIME        | E-14402       | 166 Mb   | A         |
| Drosophila                    | ercepeae        | UCSD         | 14024-0432.00 | 156 Mb   | A         |
| Hirtodrosophila               | duncani         | UCSD         | 92000-0075.00 | 205 Mb   | A         |
| Drosophila                    | pallidipennis   | UCSD         | 15210-2331.01 | 167 Mb   | A         |
| Drosophila                    | virilis         | UCSD         | 15010-1051.46 | 166 Mb   | A         |

  

| Published Data |               |                |                           |                                |             |
|----------------|---------------|----------------|---------------------------|--------------------------------|-------------|
| Genus          | Species       | Genome Source  | Male Illumina Reads       | Female Illumina Reads          | Karyotype   |
| Drosophila     | pseudoobscura | FlyBase        | PMID: 25879221            | PMID: 25879221                 | A + D       |
| Drosophila     | athabasca     | PMID: 28431021 | PMID: 28431021            | PMID: 28431021                 | A + D       |
| Drosophila     | miranda       | PMID: 22822149 | PMID: 25879221            | PMID: 25879221                 | A + D + C   |
| Drosophila     | albomicans    | PMID: 22439699 | PMID: 25879221            | PMID: 25879221                 | A + D + C   |
| Drosophila     | novomexicana  | This Study     | PMID: 28739599            | This Study: UCSD 15010-1031.00 | A           |
| Drosophila     | americana     | This Study     | PMID: 28739599            | This Study: UCSD 15010-1041.00 | Male: A + B |
| Drosophila     | lummei        | This Study     | PMID: 28739600            | This Study: UCSD 15010-1011.09 | A           |
| Drosophila     | busckii       | PMID: 26114585 | PMID: 25879221            | PMID: 25879221                 | A + F       |
| Drosophila     | willistoni    | FlyBase        | This Study: 14030-0811.24 | This Study: 14030-0811.24      | A + D       |
