# Supplementary material for: Recurrent gene co-amplification on Drosophila X and Y chromosomes
Source: PubMed Central journal article supplement (PMC6690552; doi:10.1371/journal.pgen.1008251), 2019-07-22
Supplement: pgen.1008251.s011.pdf [file pgen.1008251.s011.pdf]

**Table S2. Number of amplified Y genes.** Shown are the number of inferred amplified Y-linked genes found in each species, for a cut-off of male/female coverage ratio (M/F)  $\geq 2.5$

| species                   | no. of amplified Y genes | Karyotype |
|---------------------------|--------------------------|-----------|
| <i>D. duncani</i>         | 16                       | A         |
| <i>D. ercepeae</i>        | 8                        | A         |
| <i>D. guarani</i>         | 53                       | A         |
| <i>D. lummei</i>          | 109                      | A         |
| <i>D. micromelanica</i>   | 63                       | A         |
| <i>D. novamexicana</i>    | 105                      | A         |
| <i>D. pallidipennis</i>   | 8                        | A         |
| <i>D. pseudotalamanca</i> | 10                       | A         |
| <i>D. quadrilineata</i>   | 20                       | A         |
| <i>D. subbadia</i>        | 48                       | A         |
| <i>D. virilis</i>         | 35                       | A         |
| <i>D. americana</i>       | 323                      | A + B     |
| <i>D. nigromelanica</i>   | 38                       | A + C     |
| <i>D. athabasca</i>       | 24                       | A + D     |
| <i>D. lacertosa</i>       | 23                       | A + D     |
| <i>D. melanica</i>        | 249                      | A + D     |
| <i>D. nannoptera</i>      | 22                       | A + D     |
| <i>D. pseudoobscura</i>   | 111                      | A + D     |
| <i>D. repletoides</i>     | 25                       | A + D     |
| <i>D. robusta</i>         | 265                      | A + D     |
| <i>D. saltans</i>         | 20                       | A + D     |
| <i>D. willistoni</i>      | 187                      | A + D     |
| <i>D. albomicans</i>      | 30                       | A + D + C |
| <i>D. miranda</i>         | 143                      | A + D + C |
| <i>D. busckii</i>         | 48                       | A + F     |
| <i>D. lebanonensis</i>    | 17                       | A + F     |
