# Supplementary material for: Recurrent gene co-amplification on Drosophila X and Y chromosomes
Source: PubMed Central journal article supplement (PMC6690552; doi:10.1371/journal.pgen.1008251), 2019-07-22
Supplement: pgen.1008251.s012.pdf [file pgen.1008251.s012.pdf]

**Table S3. Amplified Y genes vs. M/F cutoffs.** Shows are the number of amplified Y genes identified, for different cut-off's of male/female coverage ratio (M/F from 2.5 to 10).

| cutoff   | #genes |
|----------|--------|
| M/F>=2.5 | 2000   |
| M/F>=3   | 954    |
| M/F>=3.5 | 542    |
| M/F>=4   | 346    |
| M/F>=4.5 | 258    |
| M/F>=5   | 205    |
| M/F>=5.5 | 178    |
| M/F>=6   | 154    |
| M/F>=6.5 | 133    |
| M/F>=7   | 117    |
| M/F>=7.5 | 104    |
| M/F>=8   | 95     |
| M/F>=8.5 | 84     |
| M/F>=9   | 75     |
| M/F>=9.5 | 69     |
| M/F>=10  | 64     |
