# Supplementary material for: Recurrent gene co-amplification on Drosophila X and Y chromosomes
Source: PubMed Central journal article supplement (PMC6690552; doi:10.1371/journal.pgen.1008251), 2019-07-22
Supplement: pgen.1008251.s013.pdf [file pgen.1008251.s013.pdf]

**Table S4. Multi-copy Y-linked genes across *Drosophila* species.** Shown are the orthologous location of multi-copy Y genes in *D. melanogaster*, and their inferred molecular function and gene expression pattern in *D. melanogaster* (data from flybase.org).

| Species              | Chromosome | Peptide ID  | Gene ID     | InterPro Domain                                                     | Molecular Function                                                          | Testes_expression | Highest_Expression_Tissue | Highest_Expression_Development | Name    | Gene Snapshot                                                                                                                                                                                                                                                                            |
|----------------------|------------|-------------|-------------|---------------------------------------------------------------------|-----------------------------------------------------------------------------|-------------------|---------------------------|--------------------------------|---------|------------------------------------------------------------------------------------------------------------------------------------------------------------------------------------------------------------------------------------------------------------------------------------------|
| <i>D. albomicans</i> | 3L         | FBpp0091021 | FBgn0053725 | Protein of unknown function DUF1091                                 | NA                                                                          | NA                | NA                        | NA                             | NA      | NA                                                                                                                                                                                                                                                                                       |
| <i>D. americana</i>  | 2L         | FBpp0080666 | FBgn0032715 | Thiolase                                                            | transferase activity, transferring acyl groups other than amino-acyl groups | Y                 | Digestive System          | Larva                          | NA      | NA                                                                                                                                                                                                                                                                                       |
| <i>D. athabasca</i>  | 2R         | FBpp0071874 | FBgn0045483 | 7TM chemoreceptor                                                   | taste receptor activity                                                     | NA                | NA                        | NA                             | Gr59a   | NA                                                                                                                                                                                                                                                                                       |
| <i>D. athabasca</i>  | 2R         | FBpp0085702 | FBgn0034429 | GNAT domain                                                         | N-acetyltransferase activity                                                | N                 | Digestive System          | Larva                          | NA      | NA                                                                                                                                                                                                                                                                                       |
| <i>D. athabasca</i>  | 2R         | FBpp0085908 | FBgn0034328 | Immune-induced protein Dim                                          | NA                                                                          | N                 | Female Head               | Adult Male                     | IM23    | NA                                                                                                                                                                                                                                                                                       |
| <i>D. athabasca</i>  | 3L         | FBpp0088483 | FBgn0036640 | Leucine-rich repeat                                                 | May be involved in the export of mRNA from the nucleus to the cytoplasm     | Y                 | Ovary                     | Embryo,Adult Female            | nxf2    | NA                                                                                                                                                                                                                                                                                       |
| <i>D. lummei</i>     | X          | FBpp0070717 | FBgn0011761 | Thioredoxin                                                         | female meiotic nuclear division, disulfide oxidoreductase activity          | Y                 | Ovary                     | Embryo, Adult Female           | dhd     | Deadhead is a thioredoxin-like protein necessary for the initiation of embryonic development.                                                                                                                                                                                            |
| <i>D. melanica</i>   | 3L         | FBpp0075822 | FBgn0028668 | V-ATPase proteolipid subunit                                        | proton-transporting ATPase activity, rotational mechanism                   | Y                 | Testes                    | Adult Male                     | Vha16-2 | NA                                                                                                                                                                                                                                                                                       |
| <i>D. melanica</i>   | 3L         | FBpp0088546 | FBgn0010424 | EF-hand domain                                                      | calcium ion binding                                                         | Y                 | Carcass of larva          | Embryo,Larva,Pupae             | TpnC73F | NA                                                                                                                                                                                                                                                                                       |
| <i>D. melanica</i>   | 3L         | FBpp0091046 | FBgn0053796 | Protein of unknown function DUF1091                                 | NA                                                                          | NA                | NA                        | NA                             | NA      | NA                                                                                                                                                                                                                                                                                       |
| <i>D. miranda</i>    | 2R         | FBpp0071501 | FBgn0026582 | High mobility group box domain                                      | nucleus                                                                     | Y                 | Ovary                     | Embryo                         | Hmg-2   | NA                                                                                                                                                                                                                                                                                       |
| <i>D. miranda</i>    | 2R         | FBpp0072323 | FBgn0060296 | Ankyrin repeat                                                      | calcium channel activity, male courtship behavior                           | Y                 | Carcass of larva          | Embryo,Larva,Pupae             | pain    | NA                                                                                                                                                                                                                                                                                       |
| <i>D. miranda</i>    | 3L         | FBpp0072616 | FBgn0004378 | Kinesin motor domain; Kinesin-associated microtubule-binding domain | ATP-dependent microtubule motor activity                                    | Y                 | Ovary                     | Embryo                         | Kip61F  | Kinesin-like protein at 61F (Kip61F) is a member of the kinesin-5 family of cytoskeletal motor proteins. Kip61F allows the crosslinking and sliding apart of adjacent microtubules. This 'sliding filament mechanism' is critical for many aspect of mitosis and chromosome segregation. |
| <i>D. miranda</i>    | 2R         | FBpp0085582 | FBgn0034491 | Hormone-sensitive lipase, N-terminal                                | lipase activity                                                             | Y                 | Ovary                     | Embryo                         | Hsl     | Hormone-sensitive lipase is involved in lipid storage                                                                                                                                                                                                                                    |
| <i>D. miranda</i>    | 2R         | FBpp0085619 | FBgn0005655 | Proliferating cell nuclear antigen, PCNA                            | DNA binding, mitotic spindle organization                                   | Y                 | Ovary                     | Embryo,Adult Female            | PCNA    | NA                                                                                                                                                                                                                                                                                       |
| <i>D. miranda</i>    | 2R         | FBpp0085706 | FBgn0034435 | NA                                                                  | spindle assembly involved in male meiosis I                                 | Y                 | Testes,Imaginal Disc      | Adult Male                     | fest    | NA                                                                                                                                                                                                                                                                                       |
| <i>D. miranda</i>    | 2R         | FBpp0086004 | FBgn0003701 | NA                                                                  | protein binding,mitotic sister chromatid segregation                        | Y                 | Ovary                     | Embryo                         | thr     | Three rows (Thr) together with Sse forms the endoprotease separate complex, which cleaves a subunit of the cohesin complex, thereby allowing separation of the sister chromatids.                                                                                                        |
| <i>D. miranda</i>    | 2R         | FBpp0086750 | FBgn0033860 | Peptidase M17, leucine aminopeptidase/peptidase B                   | aminopeptidase activity                                                     | Y                 | Testes                    | Adult Male                     | S-Lap5  | NA                                                                                                                                                                                                                                                                                       |
| <i>D. miranda</i>    | 2R         | FBpp0086788 | FBgn0033845 | SAPAP family                                                        | microtubule binding,chromosome segregation                                  | Y                 | Testes,Ovary              | Embryo                         | mars    | NA                                                                                                                                                                                                                                                                                       |
| <i>D. miranda</i>    | 2R         | FBpp0086910 | FBgn0033788 | Transcription activator MBF2                                        | NA                                                                          | Y                 | Digestive System          | Larva                          | NA      | NA                                                                                                                                                                                                                                                                                       |
| <i>D. miranda</i>    | 2R         | FBpp0087756 | FBgn0033354 | Fanconi anemia group I protein                                      | DNA polymerase binding,mitotic G2 DNA damage checkpoint                     | Y                 | Ovary                     | Embryo                         | FANCI   | NA                                                                                                                                                                                                                                                                                       |
| <i>D. miranda</i>    | 2R         | FBpp0087986 | FBgn0261385 | Pleckstrin homology domain; Anillin homology domain                 | actin binding,male meiosis cytokinesis                                      | Y                 | Ovary                     | Embryo                         | scra    | Scraps is a homolog of anillin, a conserved pleckstrin homology domain (PLEKH) containing protein that binds actin, nonmuscle myosin II and microtubules. It stabilizes the contractile ring and is required for completion of cytokinesis                                               |

|                         |    |             |             |                                                                              |                                                                                                                                                                   |    |                                       |                           |          |                                                                                                                                                                                                                                                                                                                            |
|-------------------------|----|-------------|-------------|------------------------------------------------------------------------------|-------------------------------------------------------------------------------------------------------------------------------------------------------------------|----|---------------------------------------|---------------------------|----------|----------------------------------------------------------------------------------------------------------------------------------------------------------------------------------------------------------------------------------------------------------------------------------------------------------------------------|
| <i>D. miranda</i>       | 2R | FBpp0088003 | FBgn0033216 | Diacylglycerol acyltransferase                                               | transferase activity                                                                                                                                              | Y  | Digestive System                      | Embryo,Adult Male         | NA       | NA                                                                                                                                                                                                                                                                                                                         |
| <i>D. miranda</i>       | X  | FBpp0290242 | FBgn0052666 | Protein kinase domain                                                        | protein serine/threonine kinase activity                                                                                                                          | Y  | Ovary, Salivary gland of prepupae     | Embryo,Pupae,Adult Female | Drak     | Death-associated protein kinase related (Drak) is a protein serine/threonine kinase belonging to the Death-associated protein kinase family. Drak promotes phosphorylation of sqh at sites known to stimulate actomyosin contractility. Its main characterized function is to shape epithelial tissues during development. |
| <i>D. miranda</i>       | 2R | FBpp0291585 | FBgn0054045 | NA                                                                           | NA                                                                                                                                                                | NA | NA                                    | NA                        | NA       | NA                                                                                                                                                                                                                                                                                                                         |
| <i>D. nannoptera</i>    | X  | FBpp0077024 | FBgn0031103 | Protein of unknown function DUF4791                                          | NA                                                                                                                                                                | Y  | Testes                                | Adult Male                | NA       | NA                                                                                                                                                                                                                                                                                                                         |
| <i>D. nigromelanica</i> | 2R | FBpp0085858 | FBgn0063491 | Glutathione S-transferase, N-terminal                                        | glutathione transferase activity                                                                                                                                  | Y  | Head                                  | Larva,Adult Male          | GstE9    | NA                                                                                                                                                                                                                                                                                                                         |
| <i>D. nigromelanica</i> | 2R | FBpp0086954 | FBgn0011604 | ISWI family                                                                  | DNA-dependent ATPase activity; nucleosome-dependent ATPase activity; protein binding; transcription factor binding; sperm chromatin condensation; spermatogenesis | Y  | Ovary, Imaginal Disc and CNS of larva | Embryo                    | Iswi     | NA                                                                                                                                                                                                                                                                                                                         |
| <i>D. pseudoobscura</i> | 3L | FBpp0076362 | FBgn0035915 | Peptidase M17, leucine aminopeptidase/peptidase B                            | aminopeptidase activity                                                                                                                                           | Y  | Testes                                | Adult Male                | S-Lap1   | NA                                                                                                                                                                                                                                                                                                                         |
| <i>D. pseudoobscura</i> | 3L | FBpp0076363 | FBgn0052351 | Peptidase M17, leucine aminopeptidase/peptidase B                            | aminopeptidase activity                                                                                                                                           | Y  | Testes                                | Adult Male                | S-Lap2   | NA                                                                                                                                                                                                                                                                                                                         |
| <i>D. pseudoobscura</i> | 3L | FBpp0076372 | FBgn0035916 | Rab-GTPase-TBC domain                                                        | GTPase activator activity                                                                                                                                         | Y  | Ovary                                 | Embryo                    | GAPsec   | NA                                                                                                                                                                                                                                                                                                                         |
| <i>D. pseudoobscura</i> | 3L | FBpp0112062 | FBgn0035690 | Zinc finger, AD-type; Zinc finger, RING/FYVE/PHD-type; Zinc finger C2H2-type | transcription factor activity, sequence-specific DNA binding                                                                                                      | Y  | Ovary                                 | Embryo                    | NA       | NA                                                                                                                                                                                                                                                                                                                         |
| <i>D. robusta</i>       | 3L | FBpp0072987 | FBgn0010317 | Cyclin-like                                                                  | cyclin-dependent protein serine/threonine kinase regulator activity; mitotic cell cycle                                                                           | Y  | Ovary                                 | Embryo, Adult Female      | Cyclin J | NA                                                                                                                                                                                                                                                                                                                         |
| <i>D. robusta</i>       | 3L | FBpp0078102 | FBgn0046301 | Leucine-rich repeat domain                                                   | ubiquitin-protein transferase activity                                                                                                                            | Y  | Testes                                | Embryo                    | NA       | NA                                                                                                                                                                                                                                                                                                                         |
| <i>D. robusta</i>       | 3L | FBpp0312385 | FBgn0053795 | Protein of unknown function DUF1091                                          | NA                                                                                                                                                                | NA | NA                                    | NA                        | NA       | NA                                                                                                                                                                                                                                                                                                                         |
