# Supplementary material for: Recurrent gene co-amplification on Drosophila X and Y chromosomes
Source: PubMed Central journal article supplement (PMC6690552; doi:10.1371/journal.pgen.1008251), 2019-07-22
Supplement: pgen.1008251.s014.pdf [file pgen.1008251.s014.pdf]

**Table S5. Inferred copy numbers for co-amplified X and Y genes**

| <b>Species</b>          | <b>Gene</b>        | <b>X copies in assembly</b> | <b>Inferred Y Copy Number</b> |
|-------------------------|--------------------|-----------------------------|-------------------------------|
| <i>D. albomicans</i>    | <i>FBgn0053725</i> | 2                           | 16                            |
| <i>D. americana</i>     | <i>FBgn0032715</i> | 3                           | 13                            |
| <i>D. athabasca</i>     | <i>FBgn0034328</i> | 2                           | 9                             |
| <i>D. athabasca</i>     | <i>FBgn0034429</i> | 4                           | 16                            |
| <i>D. athabasca</i>     | <i>FBgn0036640</i> | 2                           | 12                            |
| <i>D. athabasca</i>     | <i>FBgn0045483</i> | 3                           | 16                            |
| <i>D. lummei</i>        | <i>dhd</i>         | 2                           | 10                            |
| <i>D. melanica</i>      | <i>FBgn0010424</i> | 2                           | 9                             |
| <i>D. melanica</i>      | <i>FBgn0028668</i> | 2                           | 8                             |
| <i>D. melanica</i>      | <i>FBgn0053796</i> | 2                           | 8                             |
| <i>D. miranda</i>       | <i>Drak</i>        | 2                           | 232                           |
| <i>D. miranda</i>       | <i>FBgn0026582</i> | 2                           | 39                            |
| <i>D. miranda</i>       | <i>FBgn0033216</i> | 2                           | 10                            |
| <i>D. miranda</i>       | <i>FBgn0033354</i> | 3                           | 15                            |
| <i>D. miranda</i>       | <i>FBgn0033788</i> | 2                           | 8                             |
| <i>D. miranda</i>       | <i>FBgn0034491</i> | 2                           | 8                             |
| <i>D. miranda</i>       | <i>FBgn0054045</i> | 2                           | 14                            |
| <i>D. miranda</i>       | <i>FBgn0060296</i> | 2                           | 186                           |
| <i>D. miranda</i>       | <i>fest</i>        | 4                           | 147                           |
| <i>D. miranda</i>       | <i>Klp61F</i>      | 3                           | 18                            |
| <i>D. miranda</i>       | <i>mars</i>        | 2                           | 32                            |
| <i>D. miranda</i>       | <i>PCNA</i>        | 2                           | 8                             |
| <i>D. miranda</i>       | <i>S-Lap5</i>      | 3                           | 82                            |
| <i>D. miranda</i>       | <i>scra</i>        | 4                           | 289                           |
| <i>D. miranda</i>       | <i>thr</i>         | 2                           | 35                            |
| <i>D. nannoptera</i>    | <i>FBgn0031103</i> | 2                           | 158                           |
| <i>D. nigromelanica</i> | <i>FBgn0063491</i> | 3                           | 33                            |
| <i>D. nigromelanica</i> | <i>lswi</i>        | 2                           | 8                             |
| <i>D. pseudoobscura</i> | <i>FBgn0035690</i> | 3                           | 19                            |
| <i>D. pseudoobscura</i> | <i>GAPsec</i>      | 2                           | 68                            |
| <i>D. pseudoobscura</i> | <i>S-Lap1</i>      | 2                           | 61                            |
| <i>D. pseudoobscura</i> | <i>S-Lap2</i>      | 2                           | 159                           |
| <i>D. robusta</i>       | <i>FBgn0010317</i> | 2                           | 8                             |
| <i>D. robusta</i>       | <i>FBgn0046301</i> | 2                           | 297                           |
| <i>D. robusta</i>       | <i>FBgn0053795</i> | 2                           | 9                             |
