# Supplementary material for: Recurrent gene co-amplification on Drosophila X and Y chromosomes
Source: PubMed Central journal article supplement (PMC6690552; doi:10.1371/journal.pgen.1008251), 2019-07-22
Supplement: pgen.1008251.s015.pdf [file pgen.1008251.s015.pdf]

**Table S6. Comparison of inferred copy numbers of co-amplified X and Y genes.** Shown are inferred copy numbers of co-amplified X and Y genes, based on our analysis, and compared to high-quality genome assemblies from *D. miranda* and *D. pseudoobscura*.

| Genes                   | <i>D. mel</i><br>homolog | Y<br>copies<br>M/F<br>cov | X<br>copies<br>assembly | Y copies long read assembly |              |             |              |            | X copies long read assembly |      |             |              |          |
|-------------------------|--------------------------|---------------------------|-------------------------|-----------------------------|--------------|-------------|--------------|------------|-----------------------------|------|-------------|--------------|----------|
|                         |                          |                           |                         | Y total                     | 0.9-<br>>0.9 | 0.9-<br>0.5 | 0.5-<br>0.25 | <0.25      | X total                     | >0.9 | 0.9-<br>0.5 | 0.5-<br>0.25 | <0.25    |
|                         |                          |                           |                         | >25%                        | >0.9         | 0.9-<br>0.5 | 0.5-<br>0.25 | <0.25      | >25%                        | >0.9 | 0.9-<br>0.5 | 0.5-<br>0.25 | <0.25    |
| <i>D. miranda</i>       |                          |                           |                         |                             |              |             |              |            |                             |      |             |              |          |
| FBgn0064414             | <i>thr</i>               | 35                        | 2                       | 28                          | 20           | 5           | 3            | 8          | 1                           | 1    | 0           | 0            | 0        |
| FBgn0070787             | <i>FBgn0034491</i>       | 8                         | 2                       | 4                           | 3            | 1           | 0            | 0          | 1                           | 1    | 0           | 0            | 0        |
| FBgn0072252             | <i>FBgn0033788</i>       | 8                         | 2                       | 2                           | 0            | 2           | 0            | 0          | 2                           | 2    | 0           | 0            | 0        |
| FBgn0074335             | <i>mars</i>              | 32                        | 2                       | 48                          | 36           | 10          | 2            | 1          | 6                           | 2    | 2           | 2            | 0        |
| FBgn0074933             | <i>FBgn0033860</i>       | 82                        | 3                       | 77                          | 60           | 15          | 2            | 3          | 2                           | 1    | 1           | 0            | 2        |
| FBgn0075168             | <i>FBgn0033216</i>       | 10                        | 2                       | 3                           | 1            | 0           | 2            | 0          | 3                           | 1    | 0           | 2            | 0        |
| FBgn0075258             | <i>scra</i>              | 289                       | 4                       | 9                           | 6            | 1           | 2            | 2          | 2                           | 1    | 0           | 1            | 2        |
| FBgn0077065             | <i>Drak</i>              | 232                       | 2                       | 49                          | 0            | 0           | 0            | 60; 49>1kb | 1                           | 1    | 0           | 0            | 44       |
| FBgn0081586             | <i>Klp61F</i>            | 18                        | 3                       | 27                          | 0            | 23          | 4            | 44         | 4                           | 4    | 0           | 0            | 1        |
| FBgn0081588             | <i>PCNA</i>              | 8                         | 2                       | 4                           | 4            | 0           | 0            | 0          | 1                           | 1    | 0           | 0            | 0        |
| FBgn0081758             | <i>FBgn0026582</i>       | 39                        | 2                       | 69                          | 1            | 0           | 68           | 4          | 1                           | 1    | 0           | 0            | 0        |
| FBgn0082139             | <i>fest</i>              | 147                       | 4                       | 145                         | 96           | 43          | 6            | 10         | 5                           | 3    | 2           | 0            | 0        |
| FBgn0245922             | <i>FBgn0060296</i>       | 186                       | 2                       | 181                         | 0            | 156         | 25           | 23         | 1                           | 1    | 0           | 0            | 0        |
| FBgn0246178             | <i>FBgn0054045</i>       | 14                        | 2                       | 2                           | 0            | 2           | 0            | 60         | 1                           | 1    | 0           | 0            | 0        |
| FBgn0246244             | <i>FBgn0033354</i>       | 15                        | 3                       | 9                           | 0            | 8           | 1            | 3          | 14                          | 1    | 0           | 11           | 2; 2>1kb |
| <i>D. pseudoobscura</i> |                          |                           |                         |                             |              |             |              |            |                             |      |             |              |          |
| FBgn0079543             | <i>S-Lap1</i>            | 159                       | 2                       | 127                         | 21           | 62          | 18           | 26         | 2                           | 1    | 0           | 1            | 0        |
| FBgn0250028             | <i>GAPsec</i>            | 68                        | 2                       | 95                          | 6            | 22          | 22           | 45         | 2                           | 1    | 0           | 1            | 0        |
| FBgn0070269             | <i>FBgn0035690</i>       | 19                        | 3                       | 4                           | 3            | 1           | 0            | 0          | 3                           | 1    | 0           | 2            | 0        |
