# Supplementary material for: Recurrent gene co-amplification on Drosophila X and Y chromosomes
Source: PubMed Central journal article supplement (PMC6690552; doi:10.1371/journal.pgen.1008251), 2019-07-22
Supplement: pgen.1008251.s016.pdf [file pgen.1008251.s016.pdf]

**Table S7. GO functions of multi-copy Y genes, and genes co-amplified on the X and Y.**

| GO function                   | Description                                           | P-value  |
|-------------------------------|-------------------------------------------------------|----------|
| <b>co-amplified X/Y genes</b> |                                                       |          |
| GO:0035041                    | sperm chromatin decondensation                        | 2.61E-04 |
| GO:0007051                    | spindle organization                                  | 4.86E-04 |
| GO:0022402                    | cell cycle process                                    | 6.44E-04 |
| GO:0007052                    | mitotic spindle organization                          | 9.68E-04 |
| <b>multi-copy Y genes</b>     |                                                       |          |
| GO:0006518                    | peptide metabolic process                             | 2.37E-09 |
| GO:0006412                    | translation                                           | 4.79E-08 |
| GO:0043043                    | peptide biosynthetic process                          | 9.32E-08 |
| GO:0043604                    | amide biosynthetic process                            | 6.40E-07 |
| GO:0043603                    | cellular amide metabolic process                      | 9.34E-07 |
| GO:0032543                    | mitochondrial translation                             | 1.25E-05 |
| GO:0044271                    | cellular nitrogen compound biosynthetic process       | 2.03E-05 |
| GO:0015985                    | energy coupled proton transport                       | 2.93E-05 |
| GO:0015986                    | ATP synthesis coupled proton transport                | 2.93E-05 |
| GO:0034645                    | cellular macromolecule biosynthetic process           | 5.95E-05 |
| GO:0009144                    | purine nucleoside triphosphate metabolic process      | 6.18E-05 |
| GO:0034622                    | cellular protein-containing complex assembly          | 6.21E-05 |
| GO:0009141                    | nucleoside triphosphate metabolic process             | 6.98E-05 |
| GO:0046034                    | ATP metabolic process                                 | 9.17E-05 |
| GO:0009123                    | nucleoside monophosphate metabolic process            | 9.36E-05 |
| GO:0065003                    | protein-containing complex assembly                   | 1.03E-04 |
| GO:0022900                    | electron transport chain                              | 1.14E-04 |
| GO:0009059                    | macromolecule biosynthetic process                    | 1.40E-04 |
| GO:0009205                    | purine ribonucleoside triphosphate metabolic process  | 1.66E-04 |
| GO:0002181                    | cytoplasmic translation                               | 1.75E-04 |
| GO:0022904                    | respiratory electron transport chain                  | 1.92E-04 |
| GO:1901566                    | organonitrogen compound biosynthetic process          | 1.95E-04 |
| GO:0009199                    | ribonucleoside triphosphate metabolic process         | 2.05E-04 |
| GO:1990542                    | mitochondrial transmembrane transport                 | 2.30E-04 |
| GO:1902600                    | proton transmembrane transport                        | 2.84E-04 |
| GO:0009126                    | purine nucleoside monophosphate metabolic process     | 3.74E-04 |
| GO:0009167                    | purine ribonucleoside monophosphate metabolic process | 3.74E-04 |
| GO:0009161                    | ribonucleoside monophosphate metabolic process        | 3.89E-04 |
| GO:0006091                    | generation of precursor metabolites and energy        | 4.87E-04 |
| GO:0043933                    | protein-containing complex subunit organization       | 5.16E-04 |
| GO:0045333                    | cellular respiration                                  | 5.48E-04 |
| GO:0009124                    | nucleoside monophosphate biosynthetic process         | 6.31E-04 |
| GO:0006749                    | glutathione metabolic process                         | 7.63E-04 |
