# Supplementary material for: Recurrent gene co-amplification on Drosophila X and Y chromosomes
Source: PubMed Central journal article supplement (PMC6690552; doi:10.1371/journal.pgen.1008251), 2019-07-22
Supplement: pgen.1008251.s017.pdf [file pgen.1008251.s017.pdf]

**Table S8. Mapping of total RNA and short RNA for X- and Y-linked copies of *GAPsec* and *S-Lap1***

| gene                    | chromosome | total RNA* |            | short RNA* |            |
|-------------------------|------------|------------|------------|------------|------------|
|                         |            | sense      | anti-sense | sense      | anti-sense |
| <i>GAPsec</i>           | X          | 501        | 5          | 38         | 12         |
| <i>GAPsec_dup</i>       | X          | 60         | 68         | 37         | 7          |
| <i>GAPsec_consensus</i> | Y          | 20         | 26         | 46         | 47         |
| <i>S-Lap1</i>           | X          | 39564      | 4          | 360        | 94         |
| <i>S-Lap1_dup</i>       | X          | 168        | 418        | 569        | 5465       |
| <i>S-Lap1_consensus</i> | Y          | 27033      | 21         | 3862       | 858        |

\*Reads per kb

Alignments >= MQ 20
