# Supplementary material for: Recurrent gene co-amplification on Drosophila X and Y chromosomes
Source: PubMed Central journal article supplement (PMC6690552; doi:10.1371/journal.pgen.1008251), 2019-07-22
Supplement: pgen.1008251.s018.pdf [file pgen.1008251.s018.pdf]

**Table S9. Genes showing antisense transcription and targeting by short RNAs in *D. pseudoobscura* testis.** Shown is the expression of the sense and antisense transcript, and expression of small RNA, and the location of paralogs in the *D. pseudoobscura* genome.

| <i>D. pse</i> | <i>D. pse</i> | Expression (RPM) |                      |           | <i>D. mel</i>  | <i>D. pseudoobscura</i>                                                                                                                                                             |
|---------------|---------------|------------------|----------------------|-----------|----------------|-------------------------------------------------------------------------------------------------------------------------------------------------------------------------------------|
|               |               | Sense transcript | Antisense transcript | Small RNA |                |                                                                                                                                                                                     |
| Gene ID       | Transcript    |                  |                      |           | homolog        | duplicates location                                                                                                                                                                 |
| GA25902       | FBtr0281975   | 8.5              | 120.4                | 320.6     | <i>CG15800</i> | 4_group3[1 copy]; XL_group1a[1 copy]                                                                                                                                                |
| GA28949       | FBtr0370834   | 30.3             | 43.8                 | 420.8     | <i>ACX</i>     | 4_group4[2 copies]                                                                                                                                                                  |
| GA27727       | FBtr0377521   | 12.4             | 36.7                 | 386.6     | <i>Svil</i>    | 4_group2[2 copies]; XR_group6[1 copy];<br>Unknown_singleton_1069[2 copies]                                                                                                          |
| GA31882       | FBtr0376742   | 7.8              | 17.8                 | 450.9     | <i>none</i>    | 4_group3[1 copy], Unknown_singleton_1325[1 copy];<br>Unknown_group_211[ 1 copy]; Unknown_group_669[3 copies];<br>*Y[2 copies: Unknown_singleton_2735, Unknown_singleton_1347]       |
| GA32779       | FBtr0372083   | 8.4              | 13.9                 | 288.0     | <i>none</i>    | 2[1 copy], XR_group8[5 copies], Unknown_singleton_374[1 copy]                                                                                                                       |
| GA31908       | FBtr0372976   | 4.4              | 3.4                  | 741.7     | <i>none</i>    | XL_group1e[1 copy]; *Y[4 copies: Unknown_singleton_18[2 copies],<br>Unknown_singleton_1146, Unknown_singleton_1161];<br>Unknown_group_669[5 copies], Unknown_singleton_1699[1 copy] |

\* For some “Unknown” genes, we could infer their Y-linked location based on male-specific coverage.
